# Supplementary material for: Mitotic Arrest-Deficient 2 Like 2 (MAD2L2) Interacts with Escherichia coli Effector Protein EspF
Source: MDPI journal article supplement (doi:10.3390/life11090971), 2021-09-15
Supplement: s1 [file s1]

## Article

# Mitotic Arrest-Deficient 2 Like 2 (MAD2L2) Interacts with *Escherichia coli* Effector Protein EspF

Amin Tahoun <sup>1,2,\*</sup>, Hanem El-Sharkawy <sup>3</sup>, Samar M. Moustafa <sup>4</sup>, Lina Jamil M. Abdel-Hafez <sup>5</sup>, Ashraf Albrakati <sup>6</sup>, Manfred Koegl <sup>7</sup>, Juergen Haas <sup>8</sup>, Arvind Mahajan <sup>1</sup>, David L. Gally <sup>1</sup> and Ehab Kotb Elmahallawy <sup>9,\*</sup>

<sup>1</sup> Division of Immunity and Infection, The Roslin Institute and R(D)SVS, The University of Edinburgh, Easter Bush, Midlothian EH25 9RG, UK; a.kumarmahajan@elanco.com (A.M.); dgally@ed.ac.uk (D.L.G.)

<sup>2</sup> Department of Animal Medicine, Faculty of Veterinary Medicine, Kafrelsheikh University, Kafrelsheikh 33511, Egypt

<sup>3</sup> Department of Poultry and Rabbit Diseases, Faculty of Veterinary Medicine, Kafrelsheikh University, Kafrelsheikh 33511, Egypt; hanem\_amin@yahoo.com

<sup>4</sup> Department of Zoonoses, Faculty of Veterinary Medicine, Benha University, Benha 13511, Egypt; samar.mustafa@fvvm.bu.edu.eg

<sup>5</sup> Department of Microbiology and Immunology, Faculty of Pharmacy, October 6 University, October 6 City 12566, Giza, Egypt; Lina.jamil@ymail.com

<sup>6</sup> Department of Human Anatomy, College of Medicine, Taif University, P.O. Box 11099, Taif 21944, Saudi Arabia; a.albrakati@tu.edu.sa

<sup>7</sup> Preclinical Target Development and Genomics and Proteomics Core Facilities, German Cancer Research Center, 69120 Heidelberg, Germany; m.koegl@dkfz-heidelberg.de

<sup>8</sup> Division of Pathway Medicine and Centre for Infectious Diseases, University of Edinburgh, Edinburgh EH16 4SB, UK; juergen.haas@ed.ac.uk

<sup>9</sup> Department of Zoonoses, Faculty of Veterinary Medicine, Sohag University, Sohag 82524, Egypt

\* Correspondence: amin12\_veta@yahoo.com (A.T.); eehaa@unileon.es (E.K.E.)

## Supporting Material

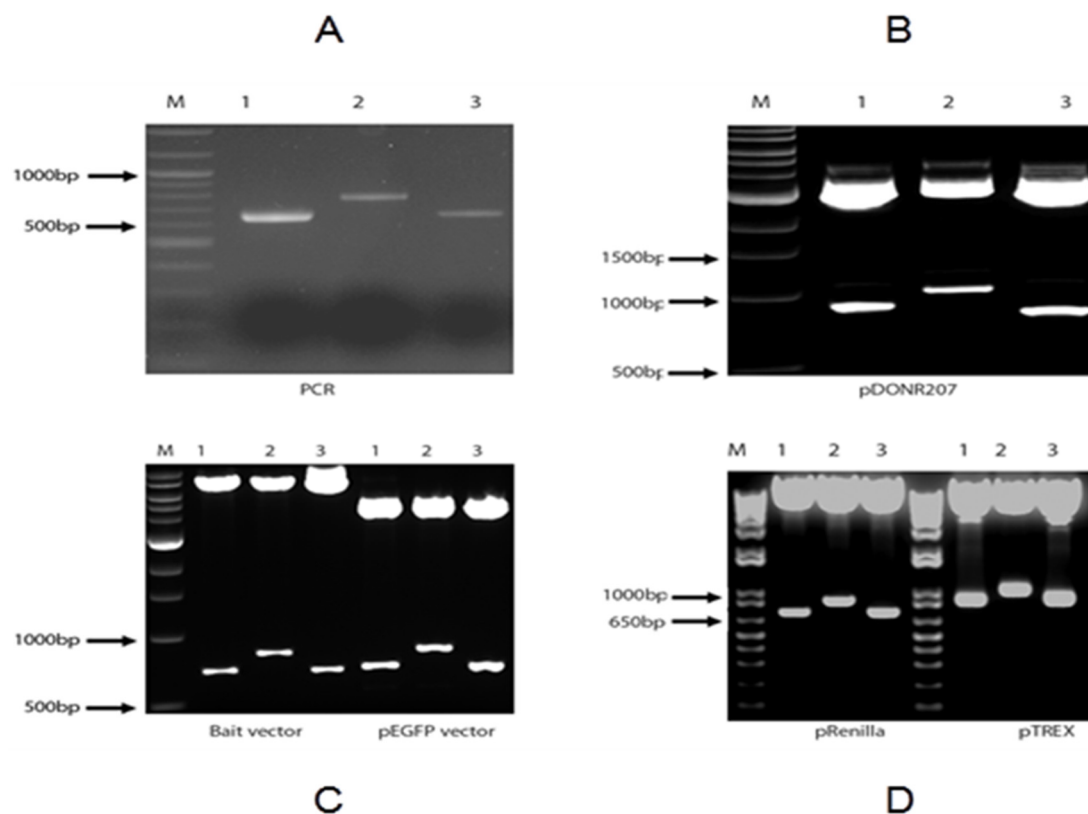

**Figure S1.** Gateway cloning of different *espF* alleles to study protein–protein interactions. Scanned image of gel red-stained 1% TAE agarose gel shows PCR amplification of the *espF* alleles from EPEC O127:H6 and the EHEC serotypes O157:H7 and O26:H11 (A). *Ban*II digests of different *espF* clones in the entry vector pDONR207 (B) and *Eco*RI and *Bam*HI digests of different ORF clones in bait constructs (C). *Eco*RI and *Bam*HI digests of different *espF* clones in the pEGFP vector (C). *Xho*I and *Xba*I digests of different ORF clones in the pcDNArenilla vector (D). *Xho*I and *Nhe*I digests of different ORF clones in pTREX (D). Lane M contains the 1 kbp-plus DNA ladder (Invitrogen), and lanes 1–3 *espF* show results for EPEC O127:H6 and EHEC serotypes O157:H7 and O26:H11, respectively.

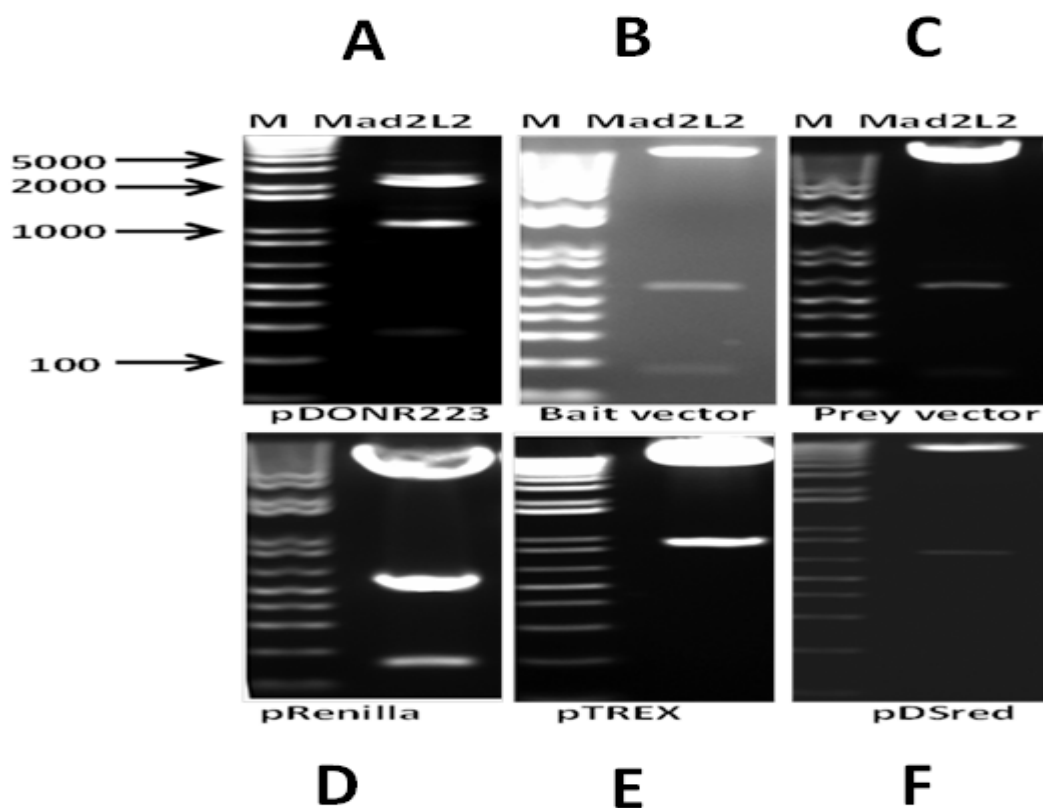

**Figure S2.** Gateway cloning of Mad2L2 gene for protein–protein interaction studies. Scanned image of gel red-stained 1% TAE agarose gels showing results of XhoI and XbaI digests of mad2L2 clone in the entry vector pDONR223 (**A**), which were then cloned into two different destination vectors to create expression clones. EcoRI and BamHI digests of different ORF clones of bait (**B**) and prey (**C**) constructs. XhoI and XbaI digests of different ORF clones in the pcDNArenilla vector (**D**). XhoI and NheI digests of different ORF clones in pTREX (**E**). EcoRI and BamHI digests of different ORF clone into PDSred (**F**). Lane M contains the 1 kbp plus DNA ladder.
